# Supplementary material for: An Examination of Women’s Self-Presentation, Social Physique Anxiety, and Setting Preferences during Injury Rehabilitation
Source: Hindawi journal article supplement (doi:10.1155/2017/6126509), 2017-01-01

## APPENDIX A

### Self-Presentation in Injury Rehabilitation Questionnaire

### Self-Presentation in Injury Rehabilitation Questionnaire (SPIRQ)

Imagine you are receiving the physiotherapy treatment for the injury described on the previous page. The clinic is one large open space similar to a gymnasium. In the middle of the space is an area where you will be required to perform your exercises (e.g., stretching and strengthening exercises). There are treatment beds around the perimeter of the exercise area where your hands-on (i.e., manual) treatment will be provided by your physiotherapist and where you will receive IFC and ice. There are many mirrors and windows in this space. Refer to the photos displayed at the front of the class.

Imagine that there are also many people in this clinic. There are people of all ages, all different body compositions (i.e., height and weight), and both males and females. The people consist of physiotherapists, athletic therapists, kinesiologists, receptionists, patients, parents/partners of patients, and researchers. Imagine that this is where you will be attending physiotherapy appointments.

Again, imagine that you are receiving the physiotherapy treatment for the injury described on the previous page, in the clinical setting described. Imagining how you think the *other people* in the clinic would perceive you respond to each of the following items. For example, if you think the other people would perceive you as weak, you would circle 4 or 5. However, if you think the other people would NOT perceive you as weak, you would circle 1 or 2.

**I believe the other people in the clinic would perceive me as ....**

|           |                             |                 |   |   |   |   |   |                 |
|-----------|-----------------------------|-----------------|---|---|---|---|---|-----------------|
| <b>1.</b> | Weak                        | Not at all true | 1 | 2 | 3 | 4 | 5 | Completely true |
| <b>2.</b> | Anxious                     | Not at all true | 1 | 2 | 3 | 4 | 5 | Completely true |
| <b>3.</b> | Self-conscious              | Not at all true | 1 | 2 | 3 | 4 | 5 | Completely true |
| <b>4.</b> | Relaxed                     | Not at all true | 1 | 2 | 3 | 4 | 5 | Completely true |
| <b>5.</b> | Uncoordinated               | Not at all true | 1 | 2 | 3 | 4 | 5 | Completely true |
| <b>6.</b> | Unable to perform exercises | Not at all true | 1 | 2 | 3 | 4 | 5 | Completely true |

SELF-PRESENTATION, SPA, SETTING PREFERENCES

|     |                            |                 |   |   |   |   |   |                 |
|-----|----------------------------|-----------------|---|---|---|---|---|-----------------|
| 7.  | Healthy                    | Not at all true | 1 | 2 | 3 | 4 | 5 | Completely true |
| 8.  | Fit                        | Not at all true | 1 | 2 | 3 | 4 | 5 | Completely true |
| 9.  | Unfocused                  | Not at all true | 1 | 2 | 3 | 4 | 5 | Completely true |
| 10. | Energized                  | Not at all true | 1 | 2 | 3 | 4 | 5 | Completely true |
| 11. | Difficult to work with     | Not at all true | 1 | 2 | 3 | 4 | 5 | Completely true |
| 12. | Tense                      | Not at all true | 1 | 2 | 3 | 4 | 5 | Completely true |
| 13. | Strong                     | Not at all true | 1 | 2 | 3 | 4 | 5 | Completely true |
| 14. | Composed                   | Not at all true | 1 | 2 | 3 | 4 | 5 | Completely true |
| 15. | Unable to handle pressures | Not at all true | 1 | 2 | 3 | 4 | 5 | Completely true |
| 16. | Frustrated                 | Not at all true | 1 | 2 | 3 | 4 | 5 | Completely true |
| 17. | Unconcerned                | Not at all true | 1 | 2 | 3 | 4 | 5 | Completely true |
| 18. | Coordinated                | Not at all true | 1 | 2 | 3 | 4 | 5 | Completely true |
| 19. | Unfit                      | Not at all true | 1 | 2 | 3 | 4 | 5 | Completely true |
| 20. | In control of my emotions  | Not at all true | 1 | 2 | 3 | 4 | 5 | Completely true |
|     |                            |                 |   |   |   |   |   |                 |

SELF-PRESENTATION, SPA, SETTING PREFERENCES

|     |                            |                 |   |   |   |   |   |                 |
|-----|----------------------------|-----------------|---|---|---|---|---|-----------------|
| 21. | Focused                    | Not at all true | 1 | 2 | 3 | 4 | 5 | Completely true |
| 22. | Tired                      | Not at all true | 1 | 2 | 3 | 4 | 5 | Completely true |
| 23. | Confident                  | Not at all true | 1 | 2 | 3 | 4 | 5 | Completely true |
| 24. | Dumb                       | Not at all true | 1 | 2 | 3 | 4 | 5 | Completely true |
| 25. | Unhealthy                  | Not at all true | 1 | 2 | 3 | 4 | 5 | Completely true |
| 26. | Easy to work with          | Not at all true | 1 | 2 | 3 | 4 | 5 | Completely true |
| 27. | Knowledgeable              | Not at all true | 1 | 2 | 3 | 4 | 5 | Completely true |
| 28. | Able to handle pressures   | Not at all true | 1 | 2 | 3 | 4 | 5 | Completely true |
| 29. | Unable to control emotions | Not at all true | 1 | 2 | 3 | 4 | 5 | Completely true |
| 30. | Needy                      | Not at all true | 1 | 2 | 3 | 4 | 5 | Completely true |
| 31. | Perform exercises well     | Not at all true | 1 | 2 | 3 | 4 | 5 | Completely true |
| 32. | Independent                | Not at all true | 1 | 2 | 3 | 4 | 5 | Completely true |

## APPENDIX B

### Physiotherapy Clinic Photographs

## SELF-PRESENTATION, SPA, SETTING PREFERENCES

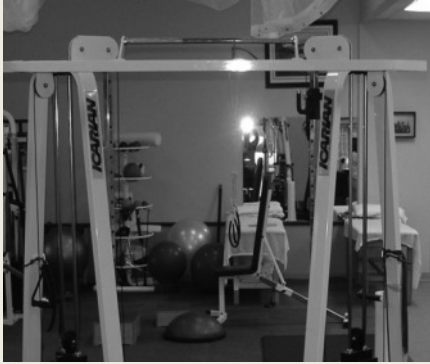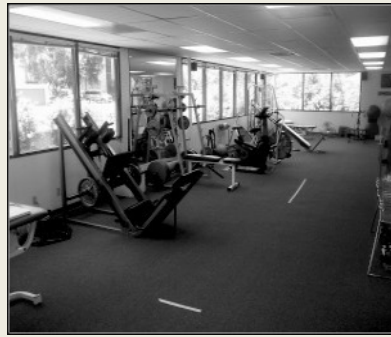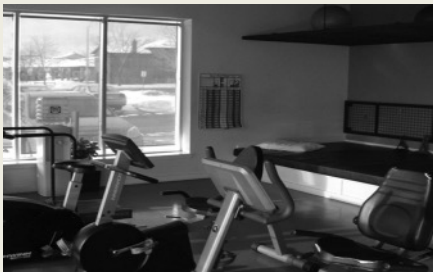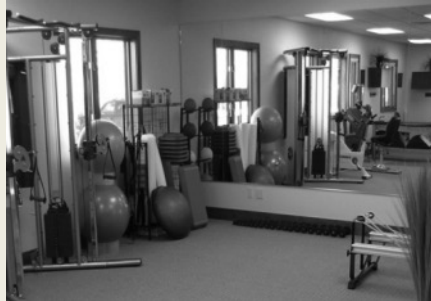

## APPENDIX C

### Injury Rehabilitation Social Environment Preferences Questionnaire

### Injury Rehabilitation Social Environment Preferences Questionnaire

Imagine you are receiving the physiotherapy treatment for the injury described on the previous page. The clinic is one large open space similar to a gymnasium. In the middle of the space is an area where you will be required to perform your exercises (e.g., stretching and strengthening exercises). There are treatment beds around the perimeter of the exercise area where your hands-on (i.e., manual) treatment will be provided by your physiotherapist and where you will receive IFC and ice. There are many mirrors and windows in this space. Refer to the photos displayed at the front of the class.

Imagine that there are also many people in this clinic. There are people of all ages, all different body compositions (i.e., height and weight), and both males and females. The people consist of physiotherapists, athletic therapists, kinesiologists, receptionists, patients, parents/partners of patients, and researchers. Imagine that this is where you will be attending physiotherapy appointments.

Instructions: Again, imagining that you are in this physiotherapy clinic receiving treatment for the injury described, use the following 5-point scale to indicate the rating that best describes your preference for each statement.

|                          |          |                          |          |                              |
|--------------------------|----------|--------------------------|----------|------------------------------|
| <b>1</b>                 | <b>2</b> | <b>3</b>                 | <b>4</b> | <b>5</b>                     |
| <b>Not<br/>Preferred</b> |          | <b>No<br/>Preference</b> |          | <b>Completely<br/>Prefer</b> |

1. The other patients in the clinic are the same sex as you. \_\_\_\_\_
2. The other patients in the clinic are of the opposite sex. \_\_\_\_\_
3. There are an equal number of males and females in the clinic. \_\_\_\_\_
4. The other patients who are in the clinic are all very athletic-looking. \_\_\_\_\_
5. The other patients who are in the clinic do not look very athletic. \_\_\_\_\_
6. The other people who are in the clinic are very social (e.g., talk to each other a lot). \_\_\_\_\_
7. The other people who are in the clinic are not very social. \_\_\_\_\_
8. The other people in the clinic are all people you would like to impress. \_\_\_\_\_
9. The other people in the clinic are people you do not feel you need to impress. \_\_\_\_\_
10. You are required to wear loose-fitting long pants and a long sleeve shirt (e.g., a track suit).  
\_\_\_\_\_



SELF-PRESENTATION, SPA, SETTING PREFERENCES

11. You are required to wear baggy shorts and a baggy t-shirt. \_\_\_\_\_
12. You are required to wear a short, tight-fitting spandex top and bottoms. \_\_\_\_\_
13. Your physiotherapist is the same sex as you. \_\_\_\_\_
14. Your physiotherapist is of the opposite sex as you. \_\_\_\_\_

APPENDIX D

Injury Rehabilitation Treatment Environment Preferences Questionnaire

### **Injury Rehabilitation Treatment Environment Preferences Questionnaire**

Read the descriptions provided below and look at the photographs that accompany the descriptions. Imagine that this is the physiotherapy clinic where you will be attending physiotherapy appointments and receiving treatment for your current injury.

Instructions: Use the following 5-point scale to indicate the rating that best describes your preference for each physiotherapy clinic depicted by the written descriptions and accompanying photographs.

|                  |                   |                   |                  |                   |
|------------------|-------------------|-------------------|------------------|-------------------|
| <b>1</b>         | <b>2</b>          | <b>3</b>          | <b>4</b>         | <b>5</b>          |
| <b>Not</b>       | <b>Slight</b>     | <b>No</b>         | <b>Much</b>      | <b>Completely</b> |
| <b>Preferred</b> | <b>Preference</b> | <b>Preference</b> | <b>Preferred</b> | <b>Preferred</b>  |

Continue to next page for photos and written descriptions.

1. The physiotherapy clinic is one large open space. There are treatment beds around the perimeter of the gym-like area where hands-on (i.e., manual) treatment is provided by the physiotherapist. Patients perform their exercises in the center of the open space. There are mirrors on most of the walls and there are windows that allow people outside of the clinic to see in. **Rating:**\_\_\_\_\_

**1**  
**Not**  
**Preferred**

**2**  
**Slight**  
**Preference**

**3**  
**No**  
**Preference**

**4**  
**Much**  
**Preferred**

**5**  
**Completely**  
**Preferred**

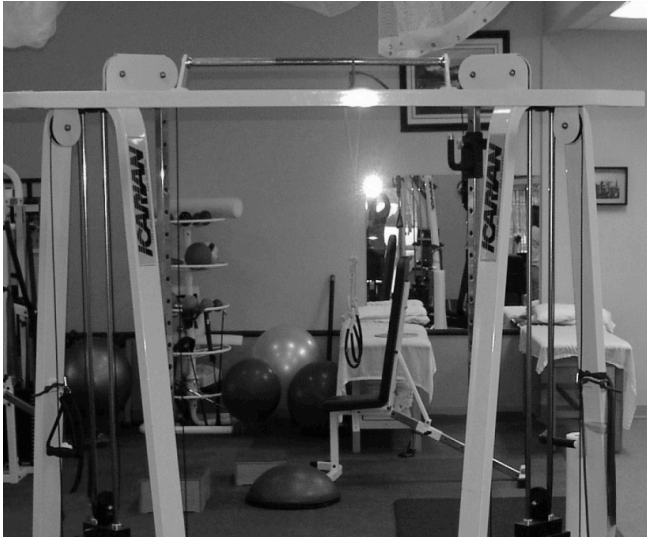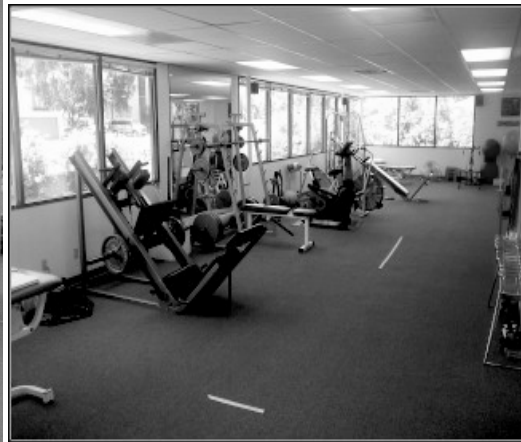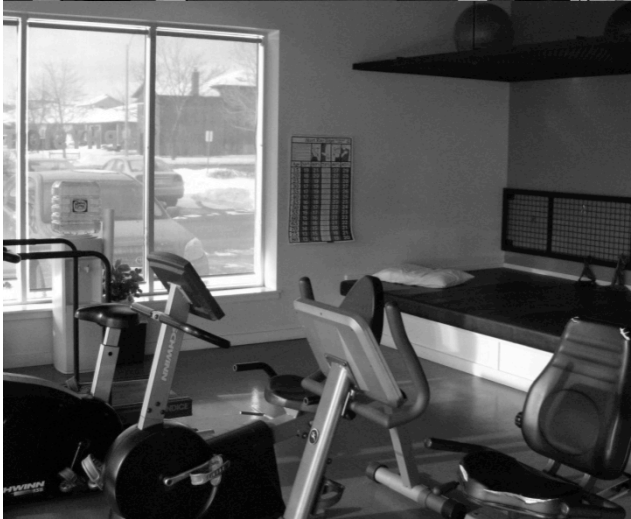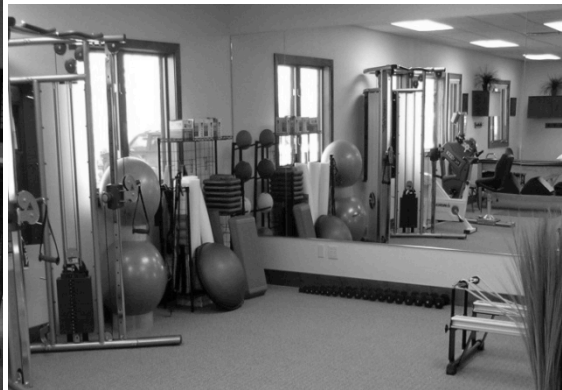

2. The physiotherapy clinic consists of multiple open spaces divided by partitions with treatment beds in one area which are each divided by a thin curtain. Hands-on (i.e., manual) treatment occurs on the beds behind the curtains. Others cannot see you, but are able to hear you. Exercises are completed in shared exercise areas. The exercise areas have mirrors on only one wall. There are few windows in the clinic and they are covered so that no one outside of the clinic can see in. **Rating:** \_\_\_\_\_

**1**  
**Not**  
**Preferred**

**2**  
**Slight**  
**Preference**

**3**  
**No**  
**Preference**

**4**  
**Much**  
**Preferred**

**5**  
**Completely**  
**Preferred**

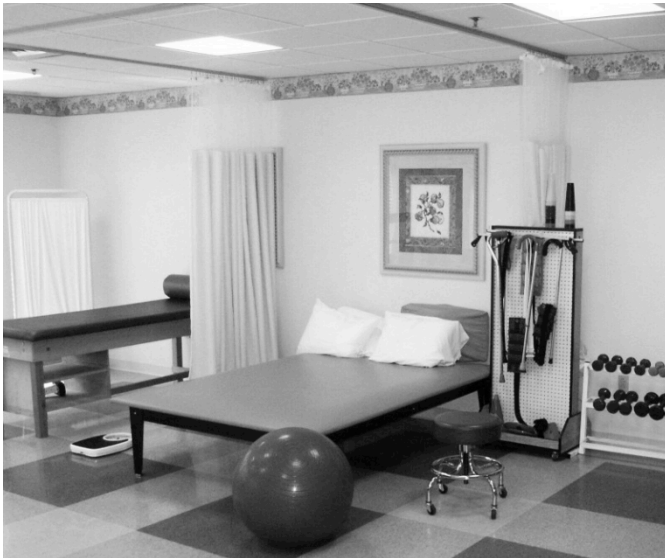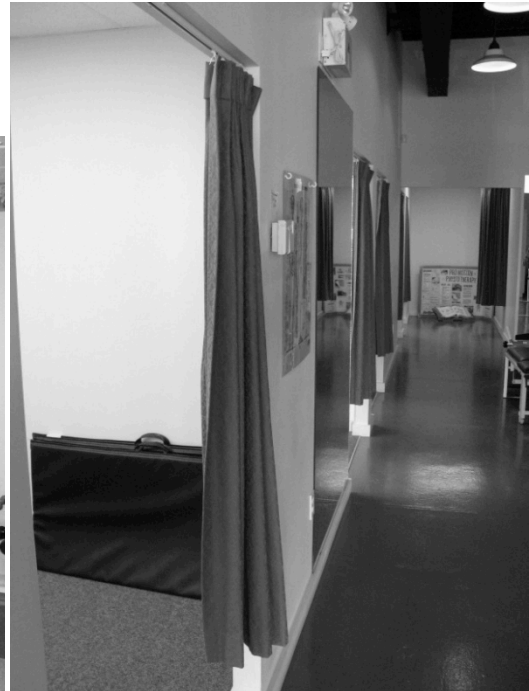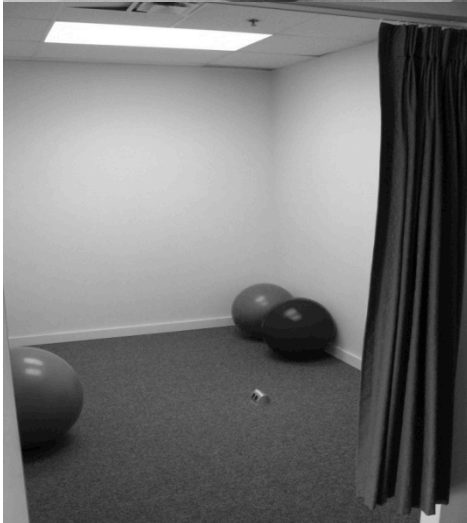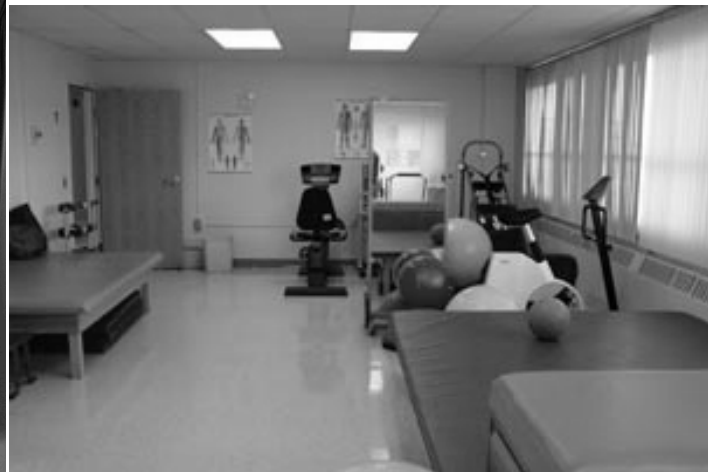

3. The physiotherapy clinic consists of many small, completely separate offices where patients are treated behind a closed door. Hands-on (i.e., manual) treatment occurs on the treatment beds within each room. Exercises are also completed in the individual rooms. There are no mirrors in the rooms. There are no windows in the rooms.

**Rating:** \_\_\_\_\_

**1**  
**Not**  
**Preferred**

**2**  
**Slight**  
**Preference**

**3**  
**No**  
**Preference**

**4**  
**Much**  
**Preferred**

**5**  
**Completely**  
**Preferred**

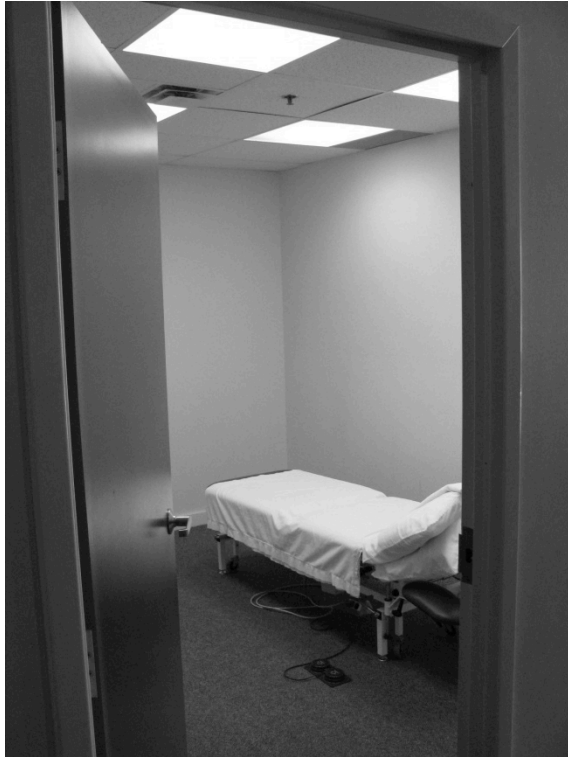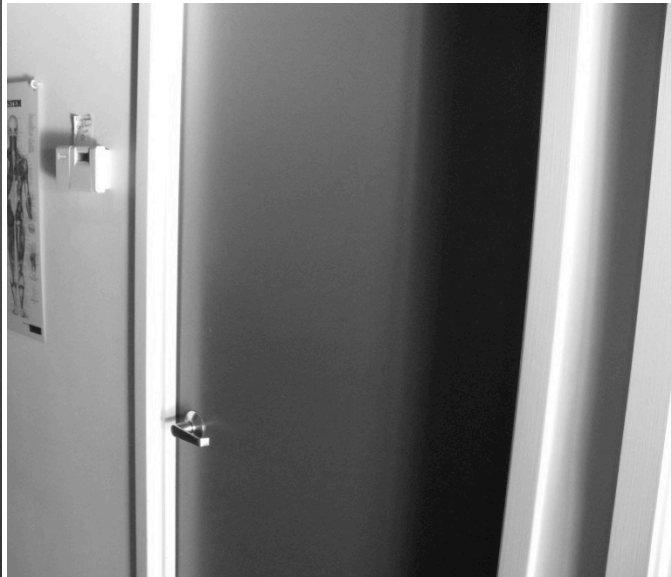

Supplement: f1 [file 6126509.f1.pdf]
